# Supplementary material for: Jasmonate-responsive MYB factors spatially repress rutin biosynthesis in Fagopyrum tataricum
Source: PubMed Central journal article supplement (PMC6018783; doi:10.1093/jxb/ery032), 2018-01-31
Supplement: ery032_suppl_supplementary-figures-s1-s10_table-s1.pdf [file ery032_suppl_supplementary-figures-s1-s10_table-s1.pdf]

Supplementary Data

**R2**

AtMYB32 MGRSPCCEKDH<sup>R3</sup>TNKGAWTKEEDDKLISYKAHGEGCWRSLPRASGLQRCGKSCRLRWINYLRFD 64  
 AtMYB7 MGRSPCCEKEHMNKGAWTKEEDERLVSYIKSHGEGCWRSLPRAAGLLRCGKSCRLRWINYLRFD 64  
 FtMYB15 MGRSPCCEKAHTNKGAWTKEEDRLIAYIKTHGEGCWRSLPKAAGLLRCGKSCRLRWINYLRFD 64  
 FtMYB14 MGRSPCCEKAHTNKGAWTKEEDRLTAYIRAHGEGCWRSLPKAAGLLRCGKSCRLRWINYLRFD 64  
 FtMYB16 MGRSPCCEKEHTNKGAWTKEEDERLINYINSHGEGSWRSLPKHAGLQRCGKSCRLRWINYLRFD 64  
 FtMYB13 MGRAPCCSKVGLHRGPWTPKEDSLITNYIQTHGEGQWRSLPKNAGLLRCGKSCRLRWINYLRFD 64  
 FtMYB11 MASSSRKDLDRIKGFWSPFEDDLQKLVKHCGRNWSLISKSIPLGRSGKSCRLRWINYLRFD 63  
 AtMYB3 MGRSPCCEKAHMNKGAWTKEEDQLIVDYIRKHGEGCWRSLPRAAGLLRCGKSCRLRWINYLRFD 64  
 AtMYB4 MGRSPCCEKAHTNKGAWTKEEDERLVAYIKAHGEGCWRSLPKAAGLLRCGKSCRLRWINYLRFD 64  
 Consensus mgrspccekahtnkgawtkeedrliaayikahgegcwrsllpkaagllrcgkscrlrwinylrpd

AtMYB32 LKRGNF<sup>R3</sup>TLEEDDLIIKLESLIGNKWSLIATRIEGRDNEIKNYWNTHVKKLLRKGIDPATHRP 128  
 AtMYB7 LKRGNFTHDEDEIIKLESLIGNKWSLIATRIEGRDNEIKNYWNTHIKRLLSKGIDPATHRG 128  
 FtMYB15 LKRGNFTEEEDDLIIKLESLIGNKWSLIAGRLEGRDNEIKNYWNTHIKRLLSRGIDPITHRS 128  
 FtMYB14 LKRGNFSDDEEDDLIIKLESLIGNKWSLIAGRLEGRDNEIKNYWNTHIKRLLSRGIDPVTHRP 128  
 FtMYB16 LKRGNF<sup>R3</sup>TQCEDDLIIIDIFTLIGNKWSFIATRIEGRDNEIKNYWNTHIKRLLARQSFTRRKN 128  
 FtMYB13 IKRGNISPD<sup>R3</sup>EDDLIIIRLEHALIGNKWSLIAGRLEGRDNEIKNYWNTHLSKLLRSQGTDPNTHKK 128  
 FtMYB11 VEHRPFTPEDEAAIVQAFARFGNKWATIARMIVGRDNEIKNHWNSTLKRKCSSMSGDFNFDL 127  
 AtMYB3 LKRGNFTEEEDDLIIKLESLIGNKWSLIAGRLEGRDNEIKNYWNTHIKRLLSRGIDPNSHRL 128  
 AtMYB4 LKRGNFTEEEDDLIIKLESLIGNKWSLIAGRLEGRDNEIKNYWNTHIRKLLINRGIDPTSHRP 128  
 Consensus lkrgnfteeedeliihlhslignkwsliagrlpgrtdneiknywnthikrllsrgidp thrp

AtMYB32 INETKTSQDSSDSSKTEDPLVK.....ILSFG..PQLEKIANFG..DERIQKRV.....EY 175  
 AtMYB7 INEAKIS....DLKKTQDQIVK.....DVSVFV..TKFEETDKSG..DQKQNKYIRNGLVCKEER 179  
 FtMYB15 VNEVEVEGEVIPSPTP.TTTTSSISFGATIP...KLEQD.LHDHNLMTNSRFAAIT.GSKSEERN 186  
 FtMYB14 LNEASSPTNTTTTNSNTRTSSTKITTTISFASNLKQEPILLDQNIITRLLSSSSPGSKLRSTN 192  
 FtMYB16 VTTTASS.....ILHFAPTSN.....NIT.....TKVLHGGPVDVGVSG.....HYHD 166  
 FtMYB13 LSDLDP<sup>R3</sup>IPPKPSKPKKRTPTQTNKKQKGS<sup>R3</sup>DP<sup>R3</sup>SAQNKTKVHQPKPVRVTSLSLTRNNSNTSEFS 192  
 FtMYB11 HANPPPLKR...SASVGPATNVSG...LNFN.PGSPSGSDISDSGSLSHVYRPVPLSVVPSFRE 185  
 AtMYB3 INESVVS....PSSLQNDVVET...IHLDFSGPVKPEPVREEIGMVNNCESG...TTSEKD 180  
 AtMYB4 IQESSASQ...DSKPTQLEPVTNT.INISFTSAPKVE<sup>R3</sup>TFHESISFPGSEKISMLTFKEEKDE 188  
 Consensus ine s dsskt dtvts nisf s pk ekvhdsg d k gsk see

**EAR**

AtMYB32 SVVEERC...LDLNLELRISPPWQDKLHDERNLRFG..RVKYRCSACRF<sup>R3</sup>FGNGKECSCNNVK 233  
 AtMYB7 VVVEEKIG...PDLNLELRISPPWQNCQ.....REISTCTASRFY<sup>R3</sup>MEMDMECSSETVK 228  
 FtMYB15 PGY.....RCPDLNLELRISPPS.HQHQPEQLKSGGIIVNSNPCFKCSFGMQSGQVCKCNTFD 243  
 FtMYB14 SGLGFEIRDQSLDLNLDL<sup>R3</sup>KISPPSHHQHQPEQLKIG.....VMCFKCNLGLQNSQDCSCNIFG 250  
 FtMYB16 SNN.....SINLELSISL<sup>R3</sup>PSTSN.....NMQEH<sup>R3</sup>ERTLW 195  
 FtMYB13 NLT<sup>R3</sup>SVSTP...TSQSGGPP<sup>R3</sup>IVPPT<sup>R3</sup>Y<sup>R3</sup>QPYD.....LTTSGVRF<sup>R3</sup>LIGCEEEDDVAGLVVQ 244  
 FtMYB11 ITPKIE.....EPETALSLSLPGFDSGEG.....SNQCSGSVDMLSQTS<sup>R3</sup>CPVVEK 231  
 AtMYB3 YGNEED.....WVNLNLELSVGP<sup>R3</sup>SYRYES.....TRKVSVD<sup>R3</sup>SAESTRRWGS<sup>R3</sup>ELFG 225  
 AtMYB4 CPVQEK<sup>R3</sup>...PDLNLELRISL<sup>R3</sup>DDVDRLQGHG...K..STTPRCFKCSLGMINGME<sup>R3</sup>CRCGRMR 243  
 Consensus sgvee pdlnlelrispps q e rcfkcsfgmengqecscntfk

**SID-domain**

AtMYB32 CQTEDSSSSSYSSSTDISSS.IGYDFLGLNN...TRVLDF.....STLEMK..... 274  
 AtMYB7 CQTE<sup>R3</sup>NSSSISYSSIDISSNVGYDFLGLK...TRILDF.....RSLEMK..... 269  
 FtMYB15 SKG.NSS...ECSNIGFH...DFLGLRG...SATLDY.....RTLEMK..... 276  
 FtMYB14 NKT.NASN...DHSNIGIH...DFLGLRV...SANLDF.....RSLEMK..... 284  
 FtMYB16 RESSNAT.....TS..... 204  
 FtMYB13 EQGVMEEP<sup>R3</sup>LVSDQSDMLDK.LYDEYLQLIKADDDHGLDFDL<sup>R3</sup>LLSDQARELDSFAESLL 302  
 FtMYB11 VFGPFSRELLSVMQDMIRQEV<sup>R3</sup>.SYM<sup>R3</sup>DQGGGT<sup>R3</sup>CYNQTEAISNAMMNRMG<sup>R3</sup>MNSVE... 285  
 AtMYB3 AHESDAVC...LCCRIGLF...RNESCRN...CRVSDV.....RTH..... 257  
 AtMYB4 CDVVGGS...KGS<sup>R3</sup>DMNG...DFLGLAKKET<sup>R3</sup>TSLLGF.....RSLEMK..... 282  
 Consensus cqg nsss sdig dflglr tr ldf rslemk

**Fig. S1.** Amino acid sequence alignment of a clade of subgroup 4 R2R3-MYB TFs from *F. tataricum* with subgroup 4 R2R3-MYB TFs from *Arabidopsis*. Sequences were aligned using the clustalW and MEGA version 5. FtMYB11 (KU498041), FtMYB13 (KY290579), FtMYB14 (KY290580), FtMYB15 (KY290581), FtMYB16 (KY290582).

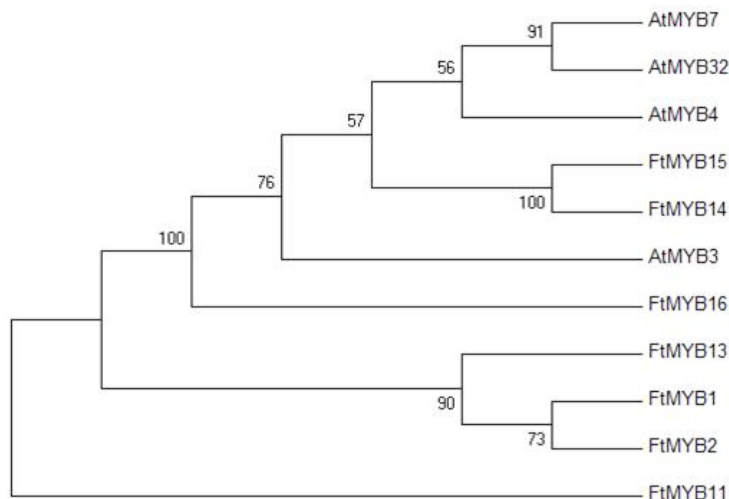

**Fig. S2.** Phylogeny of R2R3-MYB TFs including two activators: FtMYB1 (JF313345) and FtMYB2 (JF313347) from *F. tataricum* with subgroup 4 R2R3-MYB TFs from *Arabidopsis*. Phylogenetic tree is based on alignment of complete protein sequences.

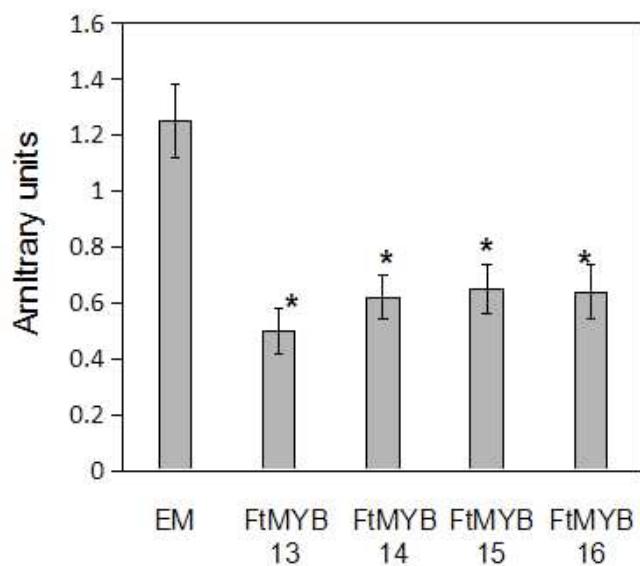

**Fig. S3.** Transcriptional repression activity assays of FtMYB13, FtMYB14, FtMYB15 and FtMYB16. The transformed yeasts were selected on SD/-W media and then  $\beta$ -galactosidase activity assays (Arbitrary units) were performed. Empty pAS2.1 vector was used as a negative control. The mean value is from three independent measurements, and error bars indicate  $\pm$  SD.

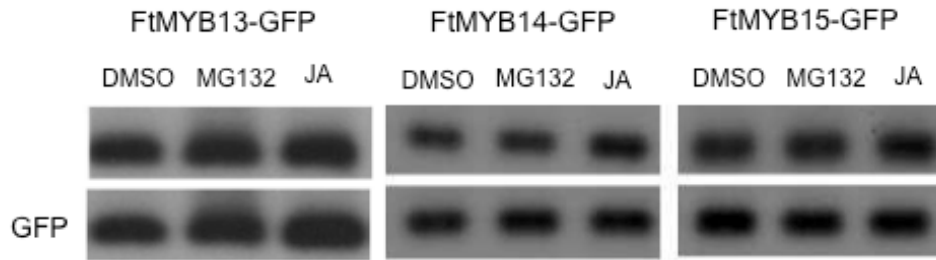

**Fig. S4.** Immunoblot analysis with anti-GFP antibodies of total protein extracts from *Arabidopsis coi-1* leaf protoplasts transiently co-expressing GFP and FtMYB13-GFP, FtMYB14-GFP or FtMYB15-GFP. *Arabidopsis* protoplasts were harvested 18 hrs after transformation of protoplasts treated for 4 hrs with the solvent DMSO at 0.1% (v/v) final concentration or with 50  $\mu$ M of the 26S proteasome inhibitor MG132 or with 50  $\mu$ M MeJA.

|           | <u>SID-motif</u> |
|-----------|------------------|
| AtMYB4    | G--FDFL--GL      |
| AtMYB7    | G--YDFL--GL      |
| AtMYB32   | G--YDFL--GL      |
| FtMYB13   | G--LDFDLDL       |
| FtMYB14   | G IHDFL--GL      |
| FtMYB15   | GFHDFL--GL       |
| Consensus | GxxDFxxxG/DL     |

**Fig. S5.** Amino acid sequence alignment of the SID domain of FtMYB13, FtMYB14 and FtMYB15 with AtMYB4, AtMYB7 and AtMYB32. Sequences were aligned using the clustalW and MEGA version 5.

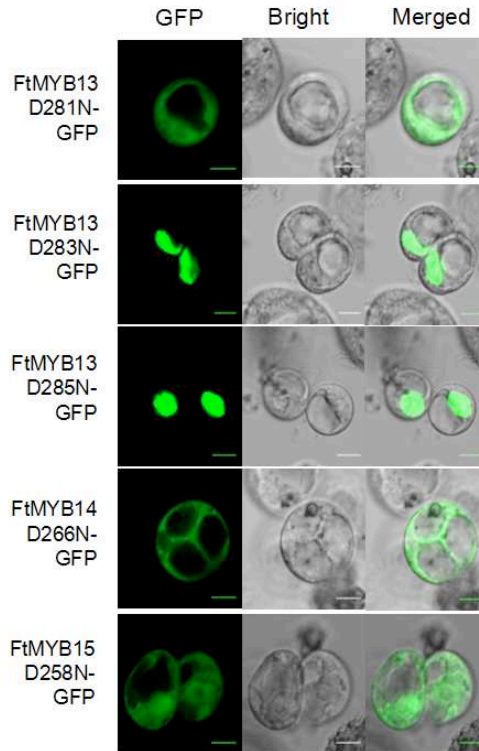

**Fig. S6.** Subcellular localization of FtMYB13D281N-GFP, FtMYB13D283N-GFP, FtMYB13D285N-GFP, FtMYB14D266N-GFP or FtMYB15D258N-GFP in Arabidopsis protoplasts. Scale bar=20  $\mu$ m.

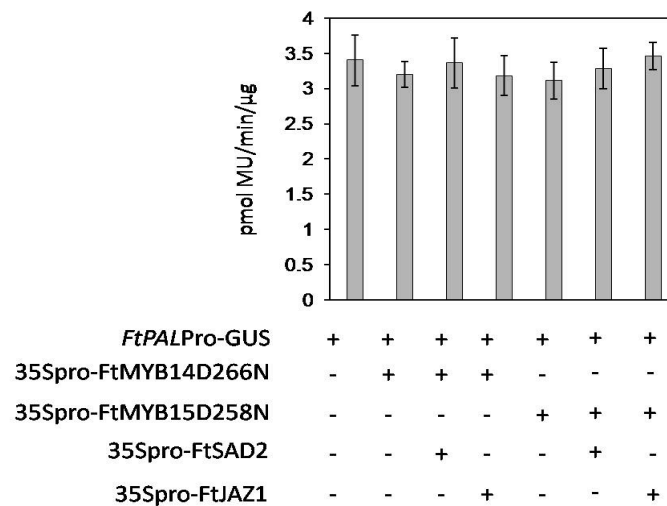

**Fig. S7.** The transcriptional activity of FtMYB14<sup>D266N</sup> or FtMYB15<sup>D258N</sup> was not affected by FtSAD2 or FtJAZ1. Arabidopsis protoplasts were co-transformed with 2 $\mu$ g reporter construct of *FtPALpro*-GUS and 2 $\mu$ g of effector plasmids. The effector constructs consisted of an expression vector carrying the CaMV 35S promoter without or with the *FtMYB14*<sup>D266N</sup>, *FtMYB15*<sup>D258N</sup>, *FtSAD2* or *FtJAZ1* genes. Values represent means  $\pm$  SE of triplicate experiments.

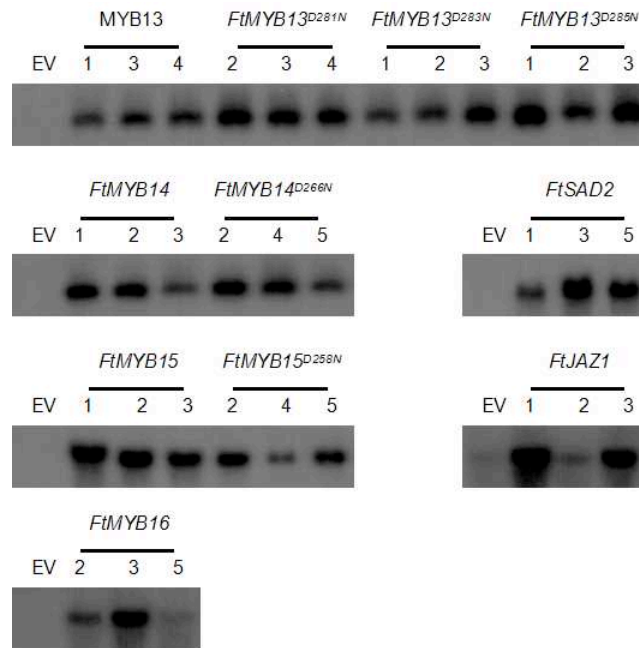

**Fig. S8.** Immunoblot analysis with anti-HA antibodies of total protein extracts from *FtMYB13-HA*, *FtMYB13<sup>D281N</sup>-HA*, *FtMYB13<sup>D283N</sup>-HA*, *FtMYB13<sup>D285N</sup>-HA*, *FtMYB14-HA*, *FtMYB14<sup>D266N</sup>-HA*, *FtMYB15-HA*, *FtMYB15<sup>D258N</sup>-HA*, *FtMYB16-HA*, *FtSAD2-HA* or *FtJAZ1-HA* overexpressing hairy root lines of *F. tataricum* as indicated. 5  $\mu$ g protein were loaded for each sample.

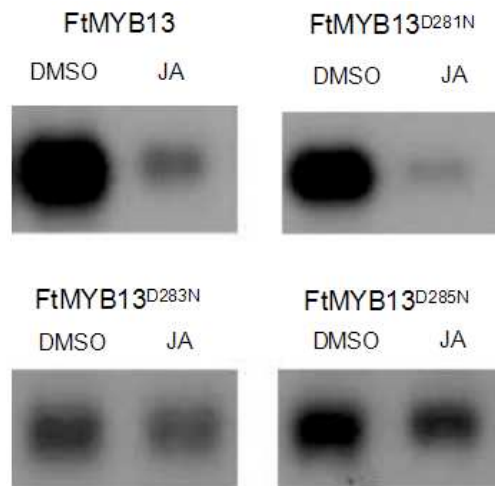

**Fig. S9.** Immunoblot analysis with anti-HA antibodies of total protein extracts from *F. tataricum* hairy roots expressing *FtMYB13-HA*, *FtMYB13<sup>D281N</sup>-HA*, *FtMYB13<sup>D283N</sup>-HA* and *FtMYB13<sup>D285N</sup>-HA*. The 20 days hairy root lines were harvested 12 hrs after treated with the solvent DMSO at 0.1% (v/v) final concentration or with 50  $\mu$ M MeJA. 5  $\mu$ g protein were loaded for each sample.



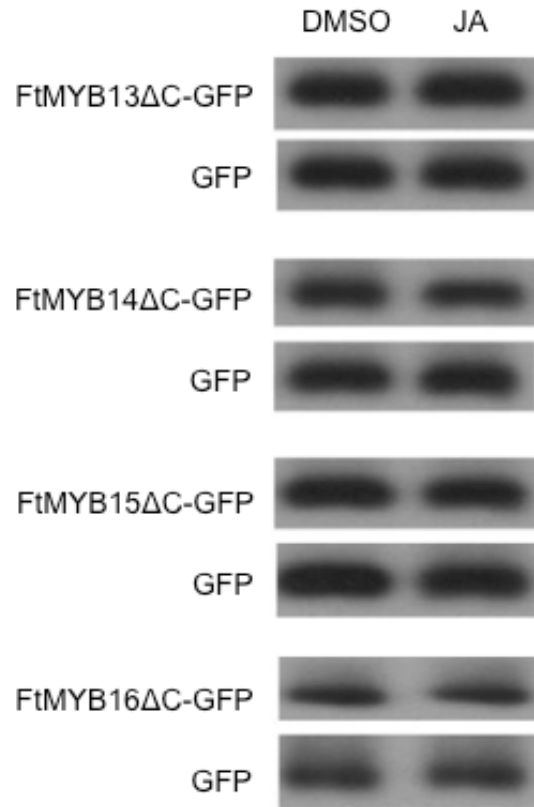

**Fig. S10** Immunoblot analysis with anti-GFP antibodies of total protein extracts from Arabidopsis cell suspension protoplasts transiently co-expressing GFP and FtMYB13ΔC-GFP, FtMYB14ΔC-GFP, FtMYB15ΔC-GFP or FtMYB16ΔC-GFP. Arabidopsis protoplasts were harvested 18 hrs after transformation of protoplasts treated for 4 hrs with the solvent DMSO at 0.1% (v/v) final concentration or with 50 μM MeJA.

**Table S1.** List of primers used in this study.

| Genes                             | Primers                                                                                      |
|-----------------------------------|----------------------------------------------------------------------------------------------|
| Primers used for qRT-PCR          |                                                                                              |
| FtMYB13                           | Fw: 5'-GCCGTACGATCTGACGACGAG-3'<br>Rv: 5'-GTCCATGATCATCATCCGC-3'                             |
| FtMYB14                           | Fw: 5'-CGAGATAAGAGATCAAAGC-3'<br>Rv: 5'-CTATGATCATTACTAGCAT-3'                               |
| FtMYB15                           | Fw: 5'-CATCAGCCAGAACAACACTG-3'<br>Rv: 5'-CATGGAAGCCAATGTTGC-3'                               |
| FtMYB16                           | Fw: 5'-ACGTCGGAGTATCCGGTC-3'<br>Rv: 5'-GCTTGTTGTGGCATTAG-3'                                  |
| FtSAD2                            | Fw: 5'-GATCCTGTGGAGCAATCTAAG-3'<br>Rv: 5'-AGACCCTGCCATTGCTCG-3'                              |
| FtH3                              | Fw: 5'-GAAATTCGCAAGTACCAGAAGAG-3'<br>Rv: 5'-CCAACAAGGTATGCCTCAGC-3'                          |
| Primers used for yeast two hybrid |                                                                                              |
| FtMYB13                           | ADFw: 5'-GCCCGGGGATGGGAAGAGCTCCTTGTTGC-3'<br>ADRv: 5'-AGCTCGAGTCAGATGAGCAAAGACTCAGC-3'       |
| FtMYB14                           | ADFw: 5'-GCCCGGGGATGGGTAGATCTCCATGTTGTG-3'<br>ADRv: 5'-AGCTCGAGTCATTTTCATCTCCAATGATC-3'      |
| FtMYB15                           | ADFw: 5'-GCCCGGGGATGGGTTCGATCTCCATGTTGC-3'<br>ADRv: 5'-AGCTCGAGTCATTTTCATCTCCAAAGTTCTATAG-3' |
| FtMYB16                           | ADFw: 5'-GCCCGGGGATGGGGAGATCACCTTGCTGC-3'<br>ADRv: 5'-AGCTCGAGCTAGCTTGTGTTGTGGCATTAGAAG-3'   |
| FtSAD2                            | BDFw: 5'-CTCATATGGATCTTCCAAGCCTCGCT-3'                                                       |

|                                                    |                                                                                                                          |
|----------------------------------------------------|--------------------------------------------------------------------------------------------------------------------------|
|                                                    | BDRv: 5'-CCGTCGACTCAAGAGAGTTCTTCGAGCAT-3'                                                                                |
| FtJAZ1                                             | ABDFw: 5'-TGCCATGGAGATGAACTTGTTCCCACTGAAAG-3'<br>ABDRv: 5'-CGGGATCCTCAGGGCTGAATCGACGTCCG-3'                              |
| FtJAZ2                                             | ABDFw: 5'-CTCATATGATGGTGAATTTGTCGGCTTCC-3'<br>ABDRv: 5'-CCGTCGACTCAAGAACGTGGATTAGCAGC-3'                                 |
| Primers used for yeast one hybrid                  |                                                                                                                          |
| FtMYB13                                            | BDFw: 5'-CTCATATGGGAAGAGCTCCTTGTTGC-3'<br>BDRv: 5'-CCGTCGACTCAGATGAGCAAAGACTCAGC-3'                                      |
| FtMYB14                                            | BDFw: 5'-CTCATATGGGTAGATCTCCATGTTGTG-3'<br>BDRv: 5'-CCGTCGACTCATTTTCATCTCCAATGATC-3'                                     |
| FtMYB15                                            | BDFw: 5'-CTCATATGGGTCGATCTCCATGTTGC-3'<br>BDRv: 5'-CCGTCGACTCATTTTCATCTCCAAAGTTCTATAG-3'                                 |
| FtMYB16                                            | BDFw: 5'-CTCATATGGGGAGATCACCTTGCTGC-3'<br>BDRv: 5'-CGGGATCCCTAGCTTGTTGTGGCATTAGAAG-3'                                    |
| <i>FtPALpro</i>                                    | Fw: 5'-CGGCGGCCGCGTCGTTAAATATCGTTAAAAT-3'<br>Rv: 5'-TGCCCGGGCCACCCCAACGGATCCTGCAC-3'                                     |
| Primers used for protoplast transactivation assays |                                                                                                                          |
| FtMYB13-HA                                         | RT101Fw: 5'-AGCTCGAGATGGGAAGAGCTCCTTGTTGC-3'<br>RT101Rv: 5'-TGTCTAGATTAGGCGTAGTCAGGCACGTCGTAAGG<br>GATGAGCAAAGACTCAGC-3' |
| FtMYB14-HA                                         | RT101Fw: 5'-AGCTCGAGATGGGTAGATCTCCATGTTGTG-3'<br>RT101Rv: 5'-TGTCTAGATTAGGCGTAGTCAGGCACGTCGTAAGG<br>TTTCATCTCCAATGATC-3' |
| FtMYB15-HA                                         | RT101Fw: 5'-AGCTCGAGATGGGTCGATCTCCATGTTGC-3'<br>RT101Rv: 5'-TGTCTAGATTAGGCGTAGTCAGGCACGTCGTAAGG                          |



|                       |                                                                                                                                                                                                                                                                                                       |
|-----------------------|-------------------------------------------------------------------------------------------------------------------------------------------------------------------------------------------------------------------------------------------------------------------------------------------------------|
|                       | TTTCATCTCCAAAGTTCTATAG-3'                                                                                                                                                                                                                                                                             |
| FtMYB16-HA            | RT101Fw: 5'-AGCTCGAGATGGGGAGATCACCTTGCTGC-3'<br>RT101Rv: 5'-TGTCTAGATTAGGCGTAGTCAGGCACGTCGTAAGG<br>GCTTGTGTGGCATTAGAAG-3'                                                                                                                                                                             |
| FtSAD2-HA             | RT101Fw: 5'-AGCTCGAGATGGATCTTCCAAGCCTCGCT-3'<br>RT101Rv:5'-TGTCTAGATTAGGCGTAGTCAGGCACGTCGTAAGGGT<br>CAAGAGAGTTCTTCGAGCAT-3'                                                                                                                                                                           |
| FtJAZ1-HA             | RT101Fw: 5'-AGCTCGAGATGAACTTGTTCCCACTGAAAGAG-3'<br>RT101Rv:5'-CCGGTACCTCAGGGCTGAATCGACGTCCG-3'                                                                                                                                                                                                        |
| <i>FtPALpro</i>       | GUSXXFw: 5'-CGGGATCCGTCGTTAAATATCGTTAAAAT-3'<br>GUSXXRv: 5'-TGCCATGGCCACCCCAACGGATCCTGCAC-3'                                                                                                                                                                                                          |
| Primers used for BiFC |                                                                                                                                                                                                                                                                                                       |
| FtMYB13               | pRTL2-HAYCFw: 5'-CCGTCGACAATGGGAAGAGCTCCTTGTTGC-3'<br>pRTL2-HAYCRv: 5'-GCAAGCGGCCGCGATGAGCAAAGACTCAGC-3'<br>GFPFw: 5'- TCGTCGACATGGGAAGAGCTCCTTGTTGC-3'<br>GFPΔNFw: 5'- TCGTCGACATGTCGGATCAGAGTGACATG-3'<br>GFPΔCRv: 5'- TCGTCGACCATGTCACTCTGATCCGACAT-3'<br>GFPRv: 5'- TCGTCGACGATGAGCAAAGACTCAGC-3' |
| FtMYB14               | pRTL2-HAYCFw: 5'-CCGTCGACAATGGGTAGATCTCCATGTTGTG-3'<br>pRTL2-HAYCRv: 5'-GCAAGCGGCCGCTTTCATCTCCAATGATC-3'<br>GFPFw: 5'- TCGTCGACATGGGTAGATCTCCATGTTGTG-3'<br>GFPΔNFw: 5'- TCGTCGACATGTTAGGGTTGCAAAACAGC-3'<br>GFPΔCRv: 5'-TCGTCGACGCTGTTTTGCAACCCTAACAT-3'<br>GFPRv: 5'- TCGTCGACTTTCATCTCCAATGATC-3'  |

|         |                                                                                                                                                                                                                                                                                                                                                         |
|---------|---------------------------------------------------------------------------------------------------------------------------------------------------------------------------------------------------------------------------------------------------------------------------------------------------------------------------------------------------------|
| FtMYB15 | <p>pRTL2-HAYCFw: 5'-<u>CCGTCGACA</u> ATGGGTCGATCTCCATGTTGC-3'</p> <p>pRTL2-HAYCRv: 5'-GCAAGCGGCCGC<br/>TTTCATCTCCAAAGTTCTATAG-3'</p> <p>GFPFw: 5'- TCGTCGACATGGGTCGATCTCCATGTTGC-3'</p> <p>GFPΔNFw: 5'- TCGTCGACATGAGTTTTGGTATGCAAAGTG-3'</p> <p>GFPΔCRv: 5'-TCGTCGACCACCTTGCATACCAAACTCAT-3'</p> <p>GFPPrv: 5'- TCGTCGAC TTTCATCTCCAAAGTTCTATAG-3'</p> |
| FtMYB16 | <p>pRTL2-YNEEFw: 5'- CCGGACTAGT<br/>ATGGGGAGATCACCTTGCTGC-3'</p> <p>pRTL2-YNEERv: 5'- CGGGATCC<br/>CTAGCTTGTTGTGGCATTAGAAG-3'</p> <p>GFPΔNFw: 5'- TCGTCGACATGGTTGACGTCGGAGTATCC-3'</p> <p>GFPΔCRv: 5'-TCGTCGACGGATACTCCGACGTCAACCAT-3'</p> <p>GFPPrv: 5'- TCGTCGACGCTTGTTGTGGCATTAGAAG-3'</p>                                                           |
| FtSAD2  | <p>pRTL2-HAYCFw: 5'-CCGTCGACAATGGATCTTCCAAGCCTCGCT-3'</p> <p>pRTL2-HAYCRv:<br/>5'-GCAAGCGGCCGCGTCAAGAGAGTTCTTCGAGCAT-3'</p>                                                                                                                                                                                                                             |
| FtJAZ1  | <p>pRTL2-HAYCFw:<br/>5'-CCGTCGACAATGAACTTGTTCCCACTGAAAGAG-3'</p> <p>pRTL2-HAYCRv:<br/>5'-GCAAGCGGCCGCGTCAGGGCTGAATCGACGTCCG-3'</p>                                                                                                                                                                                                                      |
